# Supplementary material for: Transcription Initiation Activity Sets Replication Origin Efficiency in Mammalian Cells
Source: PLoS Genet. 2009 Apr 10;5(4):e1000446. doi: 10.1371/journal.pgen.1000446 (PMC2661365; doi:10.1371/journal.pgen.1000446)
Supplement: Table S2 — List of the 97 newly identified mouse ORIs. The sequence of the 60-mer probe centred at the 800 bp significant window, the starting and ending position of that probe in the Ensembl mouse build 35 and the location relative to the genes is indicated. Blue rows show the 38 ORIs that were also identified in the arrays hybridised with 100–600 nt long nascent strands. (0.12 MB XLS) [file pgen.1000446.s003.xls]

## Sheet: Hoja1
ORI NAME	PROBE SEQUENCE	CHROMOSOME	START POSITION	END POSITION	LOCATION	CpG island
105371	CATCGTCATCAGTGAAATGCTAAGTTCTACAGCGGAACGGGGCCAGCAATTCTAAAGGAA	3	95545413	95545472	Promoter Vps45	N
105455	ATTTCTTCCCTTAGGGCTGGCGCCAACTGATGCGACCCCAAAGTCTTAACAGTCCATGCC	3	95592048	95592107	Promoter Za20d1	Y
	GCTTGTTTCCGGCCGGACGGCCGAAAGCCACCGATCCTGAACCAGCCGCTGGAGTCGGAG	3	95592347	95592406	Promoter Za20d1	Y
105597	GGGCCGATCGCGCACTTAGCATTCGCTGCGGAGAAACGAAGGACACGGGACTGAGTCCAC	3	95685088	95685147	Promoter 1810037G04Rik/BolA like1	Y
105615	CAAAGATGGGGAGCCACTGTCAAGGGTAAGGAAGCGAAGCAACTTTCCTAATTCCTTTAC	3	95707226	95707285	Histh2ab2	Y
	CACCTTTCCATATCCTTCCCTTGGAAAAAGCAGCAGAAATTGCTTATTCCGCCATGTCTG	3	95707696	95707755	Hist2h2ab	Y
105615B	CCCAATATTCAGGCTGTCTTACTTCCGAAGAAAACGGAAAGTCATAAGCCTGGAAAGAAC	3	95708076	95708135	Hist2h2ab	Y
105636	GCTTTGATGGACCAAAATCACTTAGTTCTAAGAACTTTTGGGCCCAACCTTTGAGGCAAA	3	95725391	95725450	Hist2h3c2	N
	CCCTGCAAAGACTGTCCTCACGCTAAGGAATTGTAAAGGGATTCCCCTTTGATATCCAGT	3	95725611	95725670	Hist2h3c2	N
105896	TTCAGGCAGAGCCAGCGAAACGCCTGCAAAATCTGCACAACAGAAACAGGAGTATTAGAC	3	95902077	95902136	Promoter Terc/hmm106504	Y
106169	CTTAGAACATCTGTCCTAAGGGTCTGCCCCTCTTATCTATCAATCTCCTTACTCTAAGCC	3	96068790	96068849	exon Polr3gl	N
106194	CCGCTGACCCTCCCTCCAGCGGGCTCAGTTTCCTCCCCACGCCAGTCCCAGGAAAGTCTG	3	96086417	96086476	last exon Ankrd34	Y
106197	GGAGACGATGCGAGCACAGCGGCTGCAGCCCGGTGTAGGCGTCGGTGGGAGAGGCACTTT	3	96089021	96089080	Promoter Lix1	Y
106252	CGGTTTCCATCAGTCCAAGAACCTTAATCTATCTCTTAGTTTACCTACCCGGAGAACTAA	3	96123916	96123975	Promoter Pex11b	Y
	CTCTTAACTCCAAAGAGTGCTCTCCACCATCTTCTAGGCTTTATTTTCCTCGCATGTCTT	3	96124104	96124163	Promoter Pex11b	Y
106253	ACAGAAACAGATTCGACAACTGGAGGGTCATCTGAGCCTCGGACGAAAGTGTAAGTAAAG	3	96124577	96124636	exon Pex11b	N
106324	GGGTAAGTCCTGCTTTCCGCACCCAACTTTGTTGCCTGTCAAGCCTTGAGTCGTATGGCG	3	96184367	96184426	Promoter C230057H02Rik/Pias3	Y
	TCCGGATACTTTCCCTCCATCTTTCAAGTATCCTTGGCTGCCTAAAAGCCCATCCCTTCG	3	96184657	96184716	Promoter C230057H02Rik/Pias3	Y
	GAGGGCCGAGGCACAAGGGGCGGGGACGCGGGGCCGTAGCCGCTTTTAGTAGTAGGTAGT	3	96185259	96185318	Promoter C230057H02Rik/Pias3	Y
	ACCTTAAGAGATGAGGCAGGAGCATCCTGGAGGCTTAGAGTAAGGAACTGTCCTAATGAG	3	96185549	96185608	Promoter C230057H02Rik/Pias3	Y
106334	CCTGGAAGCAAAGGGTATGAGAAAGGTTGCTCCCATAGCAGAGGGACAGAAGTCAGAACT	3	96191731	96191790	exon Pias3	N
106611	TGCCCTTCGTCCCCTCAGGAACTGAAGAATGGTGGTCTGCACCAGTCTTGCCCATAGCCT	3	96400265	96400324	3´UTR Gja8	N
	TCTTTTTCTTTTCACATTAGTAAGTTTTTGAGAAGACAAATTAGACTTTGTAAAGGAGGG	3	96400645	96400704	3´UTR Gja8	N
106777	TAGGATCTTAACCTGCTATCTCTGGCTAGAGGTAATAAGGTGTCCCCAAGTGCCTTGTTT	3	96516454	96516513	Promoter Gja5	N
106934	CCTTCACACGGTTTGAAGTGCAAGTTTCAGGTCCAAGTAACTGCCCTGACTGAGCCTGCA	3	96643765	96643824	Promoter Ace6	Y
106998	GTGAACTCCTTCTCATCAGGGAAAAGCATACGCTGGATGTCCCTCAGAGTTTGTAAGGAG	3	96695130	96695189	exon Bcl9	N
106999	GTCTCCACAAATAAGTTTTGATTACACGTGGAAATCTGTAGGATTAGAGAAATGCTTTTT	3	96697339	96697398	intronic Bcl9	N
107011	TTCTCCCCTCTACGCATCTCCCGGGTCTTACAAACTCAACCCGAAATTCCTAATTTCGCG	3	96711768	96711827	Promoter Bcl19	Y
	CACTCCCCGGTTTAAAGCCACAGAACCCTCTTTTTCAACTAAAAGATCCTCCTGCAGGAC	3	96712887	96712946	Promoter Bcl19	Y
107507	ACATGTGGGATCCCCTCACTTGGGACTCGTAATGGCAAGTGGGCTTAATACGAAAGCACA	3	97096055	97096114	Promoter Chd1l/Unknown	Y
107585	GAGGAAACCCGGTTCGCTGGTTTGGGGCGCGGCTTCAATTTCAATAACTTTATTGGTCTC	3	97144525	97144584	Promoter Undescribed/Prkab2	Y
107615	GTGCCGTCCTAGCCCCAAGGGCTGCCCGGATCGTTTCACCCTGACCAGAGATGCAATGAT	3	97167125	97167184	Intergenic	N
	GCTCCTCTAGTGGGTGCCCCGCCTTCCTTTCTTTCTATGGTTGCAACTTCCCAATGACTT	3	97167185	97167244	Intergenic	N
108091	CGCAGCCAGAAACTTTCAGCCAAACTTCGGGCGGCGGCCTGGCTGCGCGGAGTGCAGGGG	3	97499730	97499789	Promoter Notch2	Y
108117	AACTACCCAGTTTCAACCTGCCCTGCCTCAATGTTAGTTAAAACTACCCATTCTAACCTG	3	97515150	97515209	intron Notch2	N
108415	TGAGGTCTCCTCCTGTTAGAGGAAAAGTCTTCCACTAACTTCTATGGAAAGTGCTTCACT	3	97746283	97746342	Intergenic	N
108485	CCAGCATTCTTCAGAGATGTTCCTGGGGACACAGAAGGTTGCCCTGAAGATCATTGTTTA	3	97801384	97801443	exon Phgdh	N
108590	ATGTCCTTTGTCCAGCCCCACAGGAAGCCCCAGCGAGGAGGTAGTGGGCAGCCAGCCCGA	3	97868651	97868710	Promoter not annotated/Zfp697	Y
	GCACACTGGACTGTGGTCCGCCACCCCGTGGGCTCAGGAACCAAGGACAGAAGGGGACCC	3	97868911	97868970	Promoter not annotated/Zfp697	Y
108639	TCGGACCTGGTGAAGCACCAGCGCGTGCACACGGGCGAGAAGCCCTACATGTGCTCCGAG	3	97914742	97914801	last exon Zfp697	Y
	CCCTTCGGCTGCGGCCAGTGCGAGAAGCGCTTCAGCGACTTCTCCACGCTCACGCAGCAC	3	97914952	97915011	last exon Zfp697	Y
108851	TGTTTACAGCACTACCAGGTCTCGTGTTTTCTCTCTTAAGGTAGACCATAAGTTAGGAGC	3	98250937	98250996	Intergenic	N
108893	TTTGTTACACAAGACAAGGTCAATCAAGGAGAAGAGAAGTGGACTACTTAGAAAAGAGCA	3	98294627	98294686	intron Hao3	N
	GTTCCTCTTTTACTGGGATCATCATTATGGACAGTATGTCCACATTCTACATCAGTGTCA	3	98294917	98294976	intron Hao3	N
108934	CCTGTAGACATTCAGTGATATATGAAAGAATGTGCTTGCTCCGTGCAAATGAATATTCAG	3	98345950	98346009	Intergenic	N
109320	TGCTTCTTTTACTTTGGAATGCCAGTCTGAAAGCAGAAGTGAAAGAGGTAAACACTGGCT	3	98660819	98660878	Promoter hmm112720	N
	ACTTTGTTTTCAATTACTAACTCAAAATTATCCGAAATCAAAGCCGGCTGGTGGGTCACC	3	98661257	98661316	Promoter hmm112720	N
109330	AGTGCTCCATGCAACGGGCGGGCGGCGTTCCCCGCGCTAGTTCCTAGAGGCTGGGGCAGC	3	98665188	98665247	Promoter Tbx15	Y
109331	ACGCGCGCAAACCCTCATGAAATGAGACAGGAGAAACTTCTGTCCAAGCAGAAATCTCAG	3	98668942	98669001	Promoter Tbx15	N
109410	GACTTTCAGAGTTCCTACCACACTGAAGTAATTATTGCTAATATTTGCTCTCAGAATGCC	3	98732823	98732882	intron Tbx15	N
	TGATACCAGCACATGCCTGTGGAGTTATCAGGAAGTTTCCATTGTGGTCTTTGCCTTCTC	3	98733003	98733062	intron Tbx15	N
42495	CTACGCCTTGTTTTTCCATTGGGGAAAATAACTGATTTCTCACCTGCTTGAAAAGGGGTT	X	45510441	45510500	Promoter hmm29515	N
	TCAGTCTCCTCAGGAGTCCATGTTCTTCCTATGAGTAAGGAACAAGAATCCTTGTTCCCT	X	45510691	45510750	Promoter hmm29515	N
42523	GAGGCTAAGTCAAGCCAAGGCCATGGCCACCGGGCCGCCCGGGCCCTGCTGCTAGCGGAA	X	45539398	45539457	Promoter Rap2c	Y
	GCCCGGCCGGGTTACAGGTCGGGGCAATGGCCTTGAGAAAGGGCGCTTCGGGGAAACCTT	X	45539752	45539811	Promoter Rap2c	Y
42737	TCAACATCACTGGACTGTTGAGTTACCATTGGGAATTTAAATGCGCCATCAATACAATTA	X	45687024	45687083	intron Mbn13	N
42812	TGCGCTGCGCTAGGTGGCCCCGGTGCCGGGCGAGCCTTTAGCAGGGGTGTATAGTGGATG	X	45725610	45725669	Promoter Mbn13	Y
	GAGAGACAATTCGGATTTTAGGCGCCCGCAAGGCAACTCACGCCAAACTCCTGGAGTCGC	X	45726379	45726438	Promoter Mbn13	Y
	GACCGTCTTCCGCCTCCTTGCGGCTCGCTCGCAAAGAGCGCCAAAAAGTCGCGCTCCTGC	X	45726674	45726733	Promoter Mbn13	Y
42942	CTGAACCTAAAATCTCCAATCTTCCAGAAGAAGAAATTATTAGAGGGAACAATGTTTACC	X	45840831	45840890	Intergenic	N
	CACATTTGCTCTATAAATTGGAGGGTTTGTCTCTAAAATTGACTTATAAACATAGTCTGC	X	45840961	45841020	Intergenic	N
42979	GTGAAAATTAGAAACTCTTCAGTAAACGCATTGCCAGTGCTCCATTAGGGTCCATGTATG	X	45869948	45870007	Intergenic	N
	AAATTGCTTGCAAGCCATTTCCCGAACACTCTGTGGTGCTTCCAACTAATTGTCTTAGTG	X	45870216	45870275	Intergenic	N
43186	AAACTCACCGTATGGATTTCAATCAAGATCGACCACCAGGTGGTTAAGGTAGACTAACTT	X	46026043	46026102	intron Hs6st2	N
43276	CTAGAGTCTAAAACAAGATATTAAAATCTCCGTTGGACAATCTGTTTGTAGGAAATGAGG	X	46102337	46102396	intron Hs6st2	N
	AATGAAATTTCATTCAATGACTCATTACTTGAAGGGCAAGCCACAAATTTGGACTTGTGA	X	46102604	46102663	intron Hs6st2	N
43315	CCCACACATTGGACTAGCCATAGTTATTGCATTAACAAATCTCCATGATTTCAAAAATCA	X	46132008	46132067	intron Hs6st2	N
	AAAATCCCCAAATGGAGTATTTATAAGAAAAACTCAACTGTTTTGAAAGGGACATGTCAA	X	46132206	46132265	intron Hs6st2	N
43419	CCCCTGGTTCACTGTGGCCCAGGTCCGTGACCACCCTTAAGGGACTCACTGAGACTCACC	X	46200628	46200687	Promoter Hs6st2	Y
	GAACACGATCAGGTCATCGCCCTTGATGTCGAAGTCTACCTTGCGCAGGAGATCGCCGCG	X	46200941	46201000	Promoter Hs6st2	Y
	CATCCCCATCCCGTTGGCCCGCGGGACTCTCTGGGGCCCCGGACCCCATTTCCCTCCTTG	X	46201578	46201637	Promoter Hs6st2	Y
43949	ACTGTGGCCCAGCCCTGTCCTAGGAGGCTTGAATTGAGATTCAATGAACCATGCTTTTAA	X	46617774	46617833	intron Gpc4	N
	CCTTAGTTTTTAAAGCCAAAGACAATCATAAGAAATTACTATGAAATCTTGCTGAGTGTT	X	46617931	46617990	intron Gpc4	N
44038	ATAACAGGTCCATAAACCCTGCACTGCTCTGATAAGTATTCTACAACTGGCCTCAGGACT	X	46672498	46672557	intronGpc4	N
44064	CTGCCGCTGATTGACTGGCCCGGCTCGCACAGCGAGGCTCCGCAAACTTGGCCAAGCGGG	X	46686106	46686165	Promoter Gpc4	Y
	AGAGGAAAGGGCAGTTTCTTCCCGCTTAAGGGGCCAAGTCTCAAGAGATCCTGGTGATCT	X	46686414	46686473	Promoter Gpc4	Y
44118	CATCACTGGTTTAACTAAAAATATCCTCGTTTTTAGTGGCCAATGTTTATCTGTCAAAAA	X	46715208	46715267	Intergenic	N
44450	TATCTGCAAAAAGCAGAAAGGCTTAGATAGACTCTGAGTCGGTAAATGATAATAGACAGC	X	46940454	46940513	intron Gpc3	N
44761	GTATCCTGCAGCAGAGAGCACGGCCGCTGCGGCCCCACCAGGCTAGCGCGCTCTGGGAAG	X	47134307	47134366	Promoter Gpc3	Y
45038	TCTGACAAATGTGCGCCATGGATTTCTTGTTTGAGTTTGTCAATAAGAACCGGGGATGAA	X	47317797	47317856	exon 6330634C20Rik	N
45200	CCCCATTCTCTCTCTGGCGGGAGAAGACGAAGAGGATGGCGGTGGCCAGGCCGCCGCCCC	X	47433261	47433320	Promoter Phf6	Y
45326	TAAAGGCAAAAAGCATTTTAGGGTCTATTTCTCCTAAGGTTACTAAGTAGTTTATTTTTC	X	47508381	47508440	Promoter Hprt	Y
	GTCAGATAAGAGTTCCGGAACTGCCTTTGGTGGCGCGCGCGCGGGAGAACGCCCAGCGGA	X	47508767	47508826	Promoter Hprt	Y
45393	AAAATTCGCCACTTTTTGAATTCTTTCGTGTAAAAGTCCTTAAAACTAAGGACTGTCTCT	X	47542451	47542510	3´UTR Hprt1	N
45528	TACTCCTCTAACTTAGCAAATGTTTCCACCAATCTCAGCGCTCCCCTGGGTGATTTGAAG	X	47612983	47613042	intron Plac1	N
46013	CCGGTCCCCGCCACCCACCTTAGCCCGGCACTGAACAGCCCTGCTGTCAGTCACAGAGCC	X	47891039	47891098	Promoter Mospd1	N
46341	TCTTCCCCTCGGGGACCTCCGCAGGGCTCGAGTAATGCCAAAAGGATTTGTCTCACCGAT	X	48342118	48342177	Promoter 1700013H16Rik	Y
46576	CACCAGTGCAGCGAGGGGAGGCGGCCCGCTGGACCTAGACCAGCGCAGTGCGCAAATGCA	X	48561390	48561449	Promoter LOC100040271	Y
63155	CTCAAAGTCATCCTTTTCTTGTATTATGAATAAAAGTGGCCTCGGGCAAATTTGAAGTTA	X	65007022	65007081	Intergenic	N
	TTTCTCTCTGTTTCACATATACATACTGAGCAGAGAAAAACTGCCCTGGAAAAGAAAGGG	X	65007322	65007381	Intergenic	N
63288	GCCGGGATAACCGCCTCACCTCGGGTTGAAGTCCTGAAAGAGGCCCCTCAGGTTCATGGC	X	65145451	65145510	Promoter BC023829	Y
	CGTCGCTAACGCCGCCGCCAGGAGAAACCAGAGCAACCAACTGTCTCCCACACTCCTTCC	X	65145604	65145663	Promoter BC023829	Y
63849	TGTAACTTTAACTGGGGAAAATTGTTTACCATATCTCCAGAAAATTCAAAGCATATATTG	X	65701857	65701916	Intergenic	N
63869	CACTTATAGTCCTCAATTATAGTCTCCATCTTTTAGGATCCGGGGCCCTGGGATGCTATG	X	65718900	65718959	Promoter G630014P10RIK	Y
64153	GCTCCTAGAAAACCTAGAGAGGTTCACTAGAGGTGAGTTAGGACATGGCAATCTTGAAAT	X	65949825	65949884	intron Mtm1r	N
64516	TATACCTCCAGCCAGTGGCAAAATCTACACACCTGTGCCATTTAGTCTATCACTGAAATA	X	66223554	66223613	Promoter Hmgb3	Y
64832	AGTGTTAAACTAACTTCTCTCAACTCCTTGCTAGATTGCCAAGGCGGGTAGGAATGAATG	X	66476994	66477053	Promoter 2610030H06Rik	Y
	CGGCTCAACGTGGAGTGGCTAGGCTACTCGCCCGGCCTGCTCCTAGAGAATGATCCGCTG	X	66477264	66477323	Promoter 2610030H06Rik	Y
	TCCAGAGTTCAGGTATCCCTGAGTTCCGCTGGGCAACGGTGGCCGCTCGGCTCTGGCCTG	X	66477585	66477644	Promoter 2610030H06Rik	Y
64969	ATCTCTTTTTCTTGTGAGTAGAGGAGCAAATTCCTATTTAGATAAAAGCATTGTAGTGGG	X	66583163	66583222	Intergenic	N
65030	GACAATTGCGGCCTGGCTATCGGGGCAAGGCGGTTTTGGCGCTCGAGAGTGGCACGCCAG	X	66623280	66623339	Promoter Prrg3	Y
	CTGCGTGCGCAAACAGGGCGGCCGCCTCCTGGGCCCGGAGAACGGTGAGGCCATTTGGTT	X	66623660	66623719	Promoter Prrg3	Y
65047	ATGTCAAAGTCATTAACACACATGCCTTTGAACCCCACAGTGTCACTTCCTGTTGTATCA	X	66643780	66643839	exon Fate1	N
65148	GCATTGCTTGTCCTGTATCTTTAGTGATCTAGGGAGATGTTGACAATCAATGACCAAAGC	X	66753665	66753724	Intergenic	N
65232	GTGATCATTTTGTAATCTGGGTGATGTTTTCTTAATCTGAGTCACAGATAATATATCACT	X	66848875	66848934	Intergenic	N
65275	TTCCCATCCAAGATCAGTTCAGGCTGAGTTAGTGATCCAAGTATTATACTCTCATTTGAG	X	66883646	66883705	Intergenic	N
65456	CTCCCTGTCAGGTCTGTCTCTTGAGAGACAGAGGGGAGTAGTGACAAGTTTCCTCATACT	X	67044219	67044278	last exon Magea10	N
65490	ATTGGGCAGTGAGGCACATTTTGAGGAATTTAACTCAAGTTTTATCTTAATCTTTGCAAC	X	67083628	67083687	Intergenic	N
65691	CAGCCTTGTTTCTAGAAACCAATCCTAAGCATGTGCAAGAAATATAATTTCACTATGGAT	X	67259314	67259373	intron Gabra3	N
	AGTTCAAGTATCTCAGATAGAAACCGAGCATGATACTTGAAATTAGAAAGCAACCATGGG	X	67259624	67259683	intron Gabra3	N
65741	CTTTCTAAGGTAAGGAAGGGTCTAGTATGGAATCTAGTTAGAAGATGATGAAAATCAAAG	X	67310224	67310283	intron Gabra3	N
66088	GTCTGGGATCTCCATCTGTAAAATGGATCTAGGCACAGTAGTTCTCGACAGAACTGACCC	X	67647546	67647605	Promoter Zfp185	Y
66347	TCACAGAGGCGGCCCGACTTTTCCTGCGGCAGGAGTGCGACGCGCGCCAACGCTTGGGCT	X	67889240	67889299	Promoter F8a	Y
	GGCGCGCGACTACACAGGCGCCCTGGCGCTATTTACACGCATGCAACGCCTGGCACGGGA	X	67889550	67889609	Promoter F8a	Y
66592	TCTGGGTTTCACGGCCATAAAACTAGGAACATGCCTGAGAATGGGTTAAGAAGACTACGA	X	68118911	68118970	Promoter Uchl5ip	N
	TTTTTCATGGGCTCCAAGTCCCCAGCCTCAATCTTGCAATGGTCTGTTGGAACAGCACGA	X	68119241	68119300	Promoter Uchl5ip	N
	CCAAATGGCACTGGGACGGGGCCCCACCTGGTCCCCTATCAAGGAGCGGTTCCCCTGGCT	X	68119423	68119482	Promoter Uchl5ip	N
66648	ACTTCTGAGCAACATTGCCCACTTTGTCCTGGAAAAATGGTGTTTACTTGATAACCTTTA	X	68163056	68163115	Promoter Atp2b3	Y
	CAGCAACAGCGAAAGCCACAGCAGAGGCCGCGGTGGCGGCTGTGCCCATGCCGGGGTAAG	X	68163936	68163995	Promoter Atp2b3	Y
	GCCTGTGTGTCCTTGCGGCACTACGGGCGCGCGTCACCCAGGGGCCTCGGAACTGTCGGA	X	68164137	68164196	Promoter Atp2b3	Y
	CTGACGCTAGCATGGACAGTGCCACAGGCAAGTGGCAGAGCCACACTTGAACAAGTCCTT	X	68164502	68164561	Promoter Atp2b3	Y
	TCCTCTCTATATAACTTGGTCTCCCTAGCCTTCTGTGAATCACTATGAGGCTTGGTGACT	X	68164732	68164791	Promoter Atp2b3	Y
	CCCACTGAATGTTTGCCTCTCCAAGGACAAACCCTGAAATTTTCACAGATGGGGCTTTGG	X	68164982	68165041	Promoter Atp2b3	Y
66742	CAGCATGGTGGTAATTCTGTCCAGGTGGCCCTAGCCAGGGCGTGGCCATGAAGAGCCCCA	X	68256652	68256711	Intergenic	N
66774	TTTGCTAATTTCTATTACAGCACCTGGTGTAACACCAAGCATATGAGAGACCTATGCATT	X	68276925	68276984	intron hmm36176	N
	GACTGTCCTCTAATAATCCTCCCTGTGCGTGGAGGATAGATGCAAAGACTAAGGTTGCCA	X	68277221	68277280	intron hmm36176	N
66836	ATCACCGGGAGTTGGTTCTTAAGCAGCAGCGGGTCGCGTCGGGAAAGAGAGGGACAGTTG	X	68333775	68333834	Promoter Slc6a8	Y
	CAGATGAACTGAGGGGCTGCCTCTCAGACTTCCAGTCCAAACTGGGAGTGATTGGCCACT	X	68334949	68335008	Promoter Slc6a8	Y
66890	GCCTAAAGCAACAGTCTCAGGGATCACTTCAAGGTTTCCAGTTGCCTAGACAACGAGCCC	X	68377535	68377594	Promoter Bcap31/Abcd1	Y
	CAACAACCCTTCCAGGATCTGTCTGCAACTGTAGCCTCAGGCAGCAGTTCCAGCCCTCAG	X	68377605	68377664	Promoter Bcap31/Abcd1	Y
66938	TTCTATCTTCACTTTCTGTGCCTTGCCCTGCTTTGCCAGCCCTCTCCCTCTGTGACATGG	X	68420280	68420339	exon Plxnb3	N
66942	CATCTATGTAACCAGGGGTGAGATCCAGCGGCTGGACAATGCTGGTGATCTTCATGGTAA	X	68424477	68424536	exon Plxb3	N
66946	CAGGTTCATCTAATCAGCGTGAGACTGGAGGTCTTCTATCTCCTAGCAGTAAGTATGGGG	X	68438036	68438095	exon Srpk3	N
	CCCTCTGGAGCCCCAAAATGCAGACAAGATCAAGATCAAGATTGCAGACCTTGGCAACGC	X	68438196	68438255	exon Srpk3	N
	AAAACGGTCACCTAGACAAAGTCCCTCCTGGGACATCTGAGGAACTCAGAATCAGAAAGA	X	68438406	68438465	intron Srpk3	N
66997	ACTCTTTGCTGGCCGAGGCCAGACACAGGCATGCTCCTTCGCACCCAGCCAGGGGAAAAA	X	68485181	68485240	Promoter Pdzd4	Y
67031	CTTGCTCAGGTCCCCATCCTGATTGGATCAAAAATGGCAAAGAAAAGGGAGCAGATGGTG	X	68515126	68515185	exon L1cam	N
67050	GGCACATCAGTGAGTGCCCAAAACCATCTCTCTTAGTGTAGTCTTTATTGGCCAAAGAAC	X	68540625	68540684	Promoter L1cam	N
67065	CCCTAGGTGACATTGTCCCCAGGTATACAAGAAGGAAGGGTGTAAAGAAACCTTAACATT	X	68554637	68554696	3´UTR Avpr2/Arhgap4	N
	TCTCCCTAATAAAAGTTGCAGTTCATTTTCCACATGGAAAAAATTTCCTTGGACCAGGTA	X	68554887	68554946	3´UTR Avpr2/Arhgap4	N
	TGCTACCTCCCAAGAGACCTAGAAGAGGGCTGAGGTGAAGCAATAGGCCTATGTGGAATG	X	68555297	68555356	3´UTR Avpr2/Arhgap4	N
67077	GGGCCATTTCACCTAAGTGTGTTGTTATTTAACTACTCTGTTCTCAGAGCATAGAGGGGC	X	68566618	68566677	exon Arhgap4	N
67107	CTTCTTGCTTAGGTCTGGGTCTCTCAAGTGAAGAGGGTAAAACCCTGAATGAGGAGACAG	X	68589539	68589598	exon Renbp	N
67132	TGGAGTGTGTGAGATGGAGGGTGGGGTCAATTGCTTCACACTTGGTCCTGCCCTCAAATG	X	68625152	68625211	intron Hcfc1	N
67134	CAATAGCGAGTTTCAGCACAAAACAAAGATGGCCGCGGCATCTAGGGATGCCCGGATGAA	X	68627974	68628033	Promoter Hcfc1/hmm47831	Y
	CCCTTTTTTGAGATTTGAATTTTCCCCAGCAAAGGCAGAGAAGTAAAAATCCCCGGATGG	X	68628562	68628621	Promoter Hcfc1/hmm47831	Y
67276	TTGTGGCGCACTCTCCCAACGGGAGATGGACTGCGCACGCGCGCCAGTCTGTGTGTGTGA	X	68745661	68745720	Promoter MeCP2	Y
	GAGGGCGTCATTCGAAGGTGGCTCCAGGGAGATCGCGCTGAGAACCGTCGCTCGCGATTG	X	68745931	68745990	Promoter MeCP2	Y
	TTAGCGGTGACGCCCTCAATTGGCAGGAGTTCCTGTCTGTTTAGGCAGGGAAAAGAGGCG	X	68746446	68746505	Promoter MeCP2	Y
67458	GACCAGGCCCAGGCCTTACCCAGGTTTGCTGGCTACCCTGAGGATAGTTATACTGTGGAG	X	68890938	68890997	exon Flna	N
67466	AGCCTTTTGTTCTCGAGGACCTCAAAGAACAAGGCGGCTAAGGGGCCTAGTGGTAGCCTT	X	68906542	68906601	Promoter Flna	Y
67472	CAGAGCAGGGTCTGCAAACCCTATGTTTAGGACCAACCTTTATGAGGCTAGATGAGTGTA	X	68910733	68910792	alt prom Flna	N
